# Supplementary material
Source: PubMed Central journal article supplement (PMC5998464)
Supplement: Audibert_et_al_Melanoma_US_Supp1.pdf [file Audibert_et_al_Melanoma_US_Supp1.pdf]

Supplement 1. Proportion of advanced melanoma patients per line of treatment and per setting.

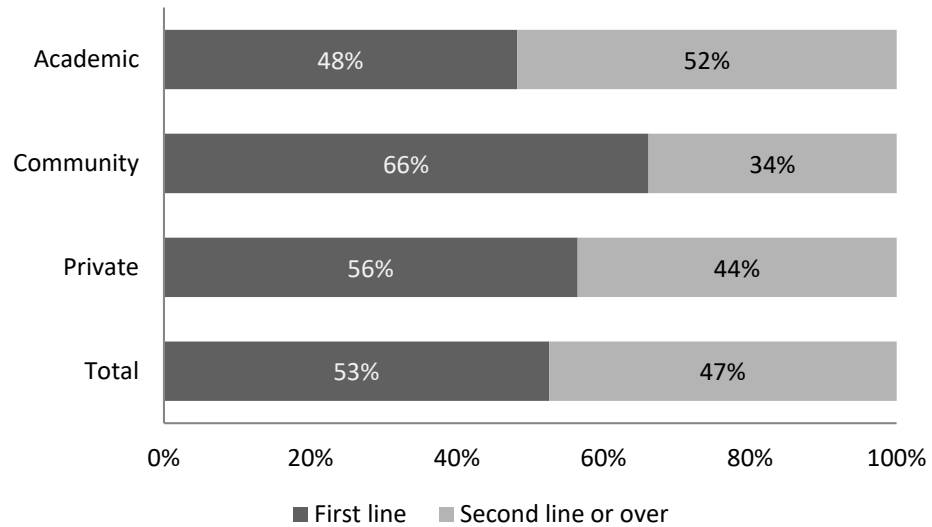

Based on a total of 101 oncologists, of which 33 from academic centers, 21 community-based centers and 47 private clinics.
